# Supplementary material for: The Aerial Parts of Agrimonia procera Wallr. and Agrimonia eupatoria L. as a Source of Polyphenols, and Especially Agrimoniin and Flavonoids
Source: MDPI journal article supplement (doi:10.3390/molecules26247706), 2021-12-20
Supplement: s1 [file s1]

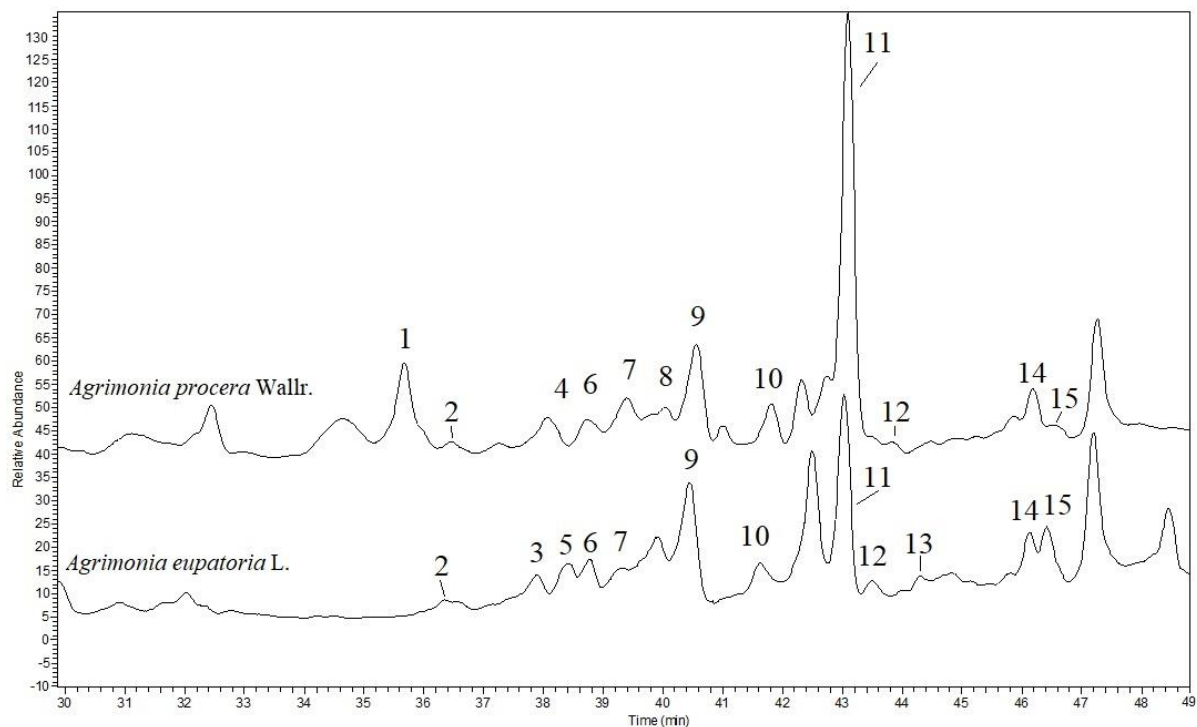

**Figure S1.** UHPLC-ESI-MS chromatograms of *Agrimonia procera* Wallr. and *Agrimonia eupatoria* L. leaves extract. Peak numbers correspond to Table 1.

**Table S1.** Eigenvalues and eigenvectors from PCA analysis for *Agrimonia procera* Wallr.

|                                                                            | PC1       | PC2   | PC3       | PC4   | PC5   | PC6   |
|----------------------------------------------------------------------------|-----------|-------|-----------|-------|-------|-------|
| <b>Eigenvalues</b>                                                         | 8.73      | 1.30  | 0.54      | 0.18  | 0.16  | 0.06  |
| Proportion of total variance                                               | 79.39     | 11.86 | 4.91      | 1.64  | 1.43  | 0.56  |
| Cumulative proportion of total variance                                    | 79.39     | 91.25 | 96.16     | 97.81 | 99.24 | 99.80 |
| <b>Eigenvectors</b>                                                        |           |       |           |       |       |       |
| Compound                                                                   | PC1       |       | PC2       |       |       |       |
| Agrimoniin                                                                 | 0.549058  |       | 0.558452  |       |       |       |
| Ellagic acid                                                               | -0.015257 |       | -0.923788 |       |       |       |
| Quercetin arabinoglycoside                                                 | -0.966533 |       | -0.118485 |       |       |       |
| Quercetin 3-O-rhamnoglucoside                                              | -0.970366 |       | -0.058606 |       |       |       |
| Quercetin 3-O-galactoside                                                  | -0.949280 |       | -0.155712 |       |       |       |
| Keampferol 3-O glucoside                                                   | -0.977404 |       | 0.155143  |       |       |       |
| Sum of kaempferol-3-O- $\beta$ -d-(6"-E-pcoumaroyl)-glucopyranoside isomer | -0.956959 |       | 0.024811  |       |       |       |
| Luteolin 7-O-glucuronide                                                   | -0.993645 |       | 0.053699  |       |       |       |
| Luteolin 7-O-glucoside                                                     | -0.960692 |       | 0.061087  |       |       |       |
| Apigenin 7-O-glucuronide                                                   | -0.971336 |       | 0.177226  |       |       |       |
| Apigenin 7-O-glucoside                                                     | -0.964197 |       | 0.187047  |       |       |       |

**Table S2.** Eigenvalues and eigenvectors from PCA analysis for *Agrimonia eupatoria* L.

|                                         | PC1       | PC2   | PC3       | PC4   | PC5   | PC6   |
|-----------------------------------------|-----------|-------|-----------|-------|-------|-------|
| <b>Eigenvalues</b>                      | 9.09      | 1.41  | 0.51      | 0.38  | 0.34  | 0.11  |
| Proportion of total variance            | 75.78     | 11.77 | 4.27      | 3.19  | 2.83  | 0.89  |
| Cumulative proportion of total variance | 75.78     | 87.55 | 91.82     | 95.01 | 97.84 | 98.73 |
| <b>Eigenvectors</b>                     |           |       |           |       |       |       |
| Compound                                | PC1       |       | PC2       |       |       |       |
| Agrimoniin                              | -0.404565 |       | -0.785010 |       |       |       |
| Ellagic acid                            | 0.461876  |       | -0.766948 |       |       |       |
| Quercetin 3-O-rhamnoglucoside           | -0.904345 |       | 0.157717  |       |       |       |

|                                                                    |           |           |
|--------------------------------------------------------------------|-----------|-----------|
| Quercetin 3-O-galactoside                                          | -0.828027 | -0.027387 |
| Quercetin 3-O-rhamnoside                                           | -0.989227 | 0.033654  |
| Sum of kaempferol-3-O-β-d-(6"-E-pcoumaroyl)-glucopyranoside isomer | -0.928683 | -0.095744 |
| Luteolin 7-O-glucuronide                                           | -0.976022 | -0.053351 |
| Luteolin 7-O-glucoside                                             | -0.818659 | 0.348285  |
| Apigenin 7-O-glucuronide                                           | -0.974242 | -0.142686 |
| Apigenin 7-O-glucoside                                             | -0.981983 | 0.021586  |
| Apigenin 8-C-glucoside (vitexin)                                   | -0.975031 | -0.087596 |
| Apigenin 6-C-glucoside (isovitexin)                                | -0.940611 | -0.139067 |

**Table S3.** Analytical parameters used for quantitative analysis

| Substance                     | Linear range<br>mg/L | Calibration curves   | R <sup>2</sup> | LOD<br>mg/L | LOQ<br>mg/L |
|-------------------------------|----------------------|----------------------|----------------|-------------|-------------|
| Agrimoniin                    | 5.0 – 249.0          | y = 18.190x – 4.580  | 0.9998         | 1.290       | 3.901       |
| Ellagic acid                  | 2.5 – 76.6           | y = 16.736x – 25.347 | 0.9997         | 0.168       | 0.508       |
| Quercetin 3-O-glucoside       | 4.1– 41.4            | y = 19.976x – 39.975 | 0.9999         | 0.202       | 0.611       |
| Quercetin 3-O-rhamnoglucoside | 1.14 –11.4           | y = 25.741x – 11.244 | 0.9997         | 0.219       | 0.663       |
| Quercetin 3-O-galactoside     | 1.6 – 16.0           | y = 20.33x – 18.862  | 0.9999         | 0.013       | 0.039       |
| Kaempferol 3-O-glucoside      | 1.4 – 14.0           | y = 16.234x – 11.244 | 0.9999         | 0.187       | 0.566       |
| KpCG*                         | 1.2 – 12.0           | y = 10.282x – 5.400  | 0.9999         | 0.0419      | 0.127       |
| Luteolin                      | 1.23 – 12.30         | y = 30.717x – 22.356 | 0.9999         | 0.019       | 0.058       |
| Apigenin 7-O-glucoside        | 1.0 – 100.0          | y = 17.314x – 26.702 | 0.9993         | 0.148       | 0.448       |

KpCG\* - kaempferol-3-O-β-d-(6"-E-pcoumaroyl)-glucopyranoside (tiliroside).
